# Supplementary material for: A low-temperature approach to synthesize low-silica SAPO-34 nanocrystals and their application in the methanol-to-olefins (MTO) reaction
Source: Royal Society of Chemistry journal article supplement (doi:10.1039/c6cy01461e), 2016-01-01
Supplement: c6cy01461e1.pdf [file c6cy01461e1.pdf]

## Electronic Supplementary Information (ESI)

### **A low-temperature approach to synthesize low-silica SAPO-34 nanocrystals and their application in the Methanol-to-Olefins (MTO) reaction**

Beibei Gao,<sup>ab</sup> Miao Yang,<sup>a</sup> Yuyan Qiao,<sup>ab</sup> Jinzhe Li,<sup>a</sup> Xiao Xiang,<sup>ab</sup> Pengfei Wu,<sup>ab</sup> Yingxu Wei,<sup>a</sup> Shutao Xu,<sup>a</sup>  
Peng Tian,<sup>\*a</sup> and Zhongmin Liu<sup>\*a</sup>

*<sup>a</sup> National Engineering Laboratory for Methanol to Olefins, Dalian National Laboratory for Clean Energy, Dalian Institute of  
Chemical Physics, Chinese Academy of Sciences, Dalian 116023, P.R. China. Fax: 0086-411-84379289; Tel: 0086-411-  
84379998; E-mail: tianpeng@dicp.ac.cn ; liuzm@dicp.ac.cn*

*<sup>b</sup> University of Chinese Academy of Sciences, Beijing 100049, P. R. China*

**Table S1** Synthesis conditions and compositions of reference samples synthesized under higher crystallization temperatures

| Sample          | Gel composition |         |                    | T/°C | t/h | Product                        | Molar composition <sup>a</sup>                             |
|-----------------|-----------------|---------|--------------------|------|-----|--------------------------------|------------------------------------------------------------|
|                 | a TEA           | b TEABr | c SiO <sub>2</sub> |      |     |                                |                                                            |
| H1              | 1.8             | 1.5     | 0.5                | 160  | 48  | SAPO-34/18 intergrowth         | —                                                          |
| H2              | 2.0             | 1.5     | 0.5                | 200  | 48  | SAPO-34/18 intergrowth         | Al <sub>0.451</sub> P <sub>0.418</sub> Si <sub>0.131</sub> |
| H3              | 2.0             | 1.5     | 0.25               | 200  | 48  | SAPO-5 +SAPO-34/18 intergrowth | Al <sub>0.484</sub> P <sub>0.444</sub> Si <sub>0.072</sub> |
| H4 <sup>b</sup> | 2.0             | -       | 0.4                | 200  | 24  | SAPO-34                        | Al <sub>0.499</sub> P <sub>0.418</sub> Si <sub>0.083</sub> |
| H5 <sup>b</sup> | 2.0             | -       | 0.2                | 170  | 72  | SAPO-34                        | Al <sub>0.490</sub> P <sub>0.441</sub> Si <sub>0.069</sub> |

<sup>a</sup> Determined by X-ray fluorescence(XRF) analysis. <sup>b</sup> TEAOH was used as the template in the synthesis gel. Sample H4 has ~1μm crystal size and higher Si content. Sample H5 has nanscaled size and comparable Si content as low-temperature sample L5.

**Table S2** Summary of the XPS results of SAPO-34 crystals

| Sample                                                      | Crystallization temperature | Molar composition                                          |                                                            | R <sup>a</sup> |
|-------------------------------------------------------------|-----------------------------|------------------------------------------------------------|------------------------------------------------------------|----------------|
|                                                             |                             | XRF                                                        | XPS                                                        |                |
| L5 <sup>b</sup>                                             | 120 °C                      | Al <sub>0.510</sub> P <sub>0.423</sub> Si <sub>0.067</sub> | Al <sub>0.450</sub> P <sub>0.474</sub> Si <sub>0.076</sub> | 1.13           |
| L5-10 <sup>b</sup>                                          | 120 °C                      | Al <sub>0.495</sub> P <sub>0.437</sub> Si <sub>0.068</sub> | Al <sub>0.456</sub> P <sub>0.473</sub> Si <sub>0.071</sub> | 1.04           |
| 1 (sample R1) <sup>c</sup>                                  | 200 °C                      | Al <sub>0.486</sub> P <sub>0.434</sub> Si <sub>0.080</sub> | Al <sub>0.453</sub> P <sub>0.341</sub> Si <sub>0.206</sub> | 2.58           |
| 2 (sample 10 with lower surface Si enrichment) <sup>c</sup> | 200 °C                      | Al <sub>0.504</sub> P <sub>0.420</sub> Si <sub>0.076</sub> | Al <sub>0.484</sub> P <sub>0.391</sub> Si <sub>0.124</sub> | 1.63           |
| 3 (SAPO-34 precursor) <sup>d</sup>                          | 200 °C                      | Al <sub>0.448</sub> P <sub>0.351</sub> Si <sub>0.200</sub> | Al <sub>0.307</sub> P <sub>0.246</sub> Si <sub>0.447</sub> | 2.24           |
| 4 (sample 2 after recrystallization) <sup>d</sup>           | 200 °C                      | Al <sub>0.485</sub> P <sub>0.379</sub> Si <sub>0.136</sub> | Al <sub>0.398</sub> P <sub>0.383</sub> Si <sub>0.219</sub> | 1.61           |

<sup>a</sup> The surface enrichment index R is defined as  $[\text{Si}/(\text{Si}+\text{P}+\text{Al})]_{\text{surface}}/[\text{Si}/(\text{Si}+\text{P}+\text{Al})]_{\text{bulk}}$  to indicate the degree of surface Si enrichment degree. <sup>b</sup> Samples obtained in this work. <sup>c</sup> SAPO-34 synthesized in the our previous work [1]. <sup>d</sup> SAPO-34 synthesized in our previous work [2].

**Table S3** Synthesis conditions and compositions of low-silica nano SAPO molecular sieves

| Sample | Gel composition <sup>a</sup> |        |                   | Seeds (wt%) | Product | Molar composition                                          |                                                            |
|--------|------------------------------|--------|-------------------|-------------|---------|------------------------------------------------------------|------------------------------------------------------------|
|        | xTEA                         | yTEABr | zSiO <sub>2</sub> |             |         | XRF <sup>b</sup>                                           | XPS <sup>c</sup>                                           |
| L5-5   | 1.8                          | 1.5    | 0.5               | 5           | SAPO-34 | Al <sub>0.514</sub> P <sub>0.423</sub> Si <sub>0.063</sub> | —                                                          |
| L5-10  | 2.0                          | 1.5    | 0.5               | 10          | SAPO-34 | Al <sub>0.495</sub> P <sub>0.437</sub> Si <sub>0.068</sub> | Al <sub>0.456</sub> P <sub>0.473</sub> Si <sub>0.071</sub> |
| L5-20  | 1.8                          | 1.5    | 0.5               | 20          | SAPO-34 | Al <sub>0.513</sub> P <sub>0.422</sub> Si <sub>0.065</sub> | —                                                          |

<sup>a</sup> x TEA: y TEABr: 0.8 Al<sub>2</sub>O<sub>3</sub>: 1.0 P<sub>2</sub>O<sub>5</sub>: z SiO<sub>2</sub>: 50 H<sub>2</sub>O (120°C, 48h). <sup>b</sup> Determined by X-ray fluorescence(XRF) analysis.

<sup>c</sup> Determined by X-ray photoelectron spectroscopy (XPS) compositional analysis.

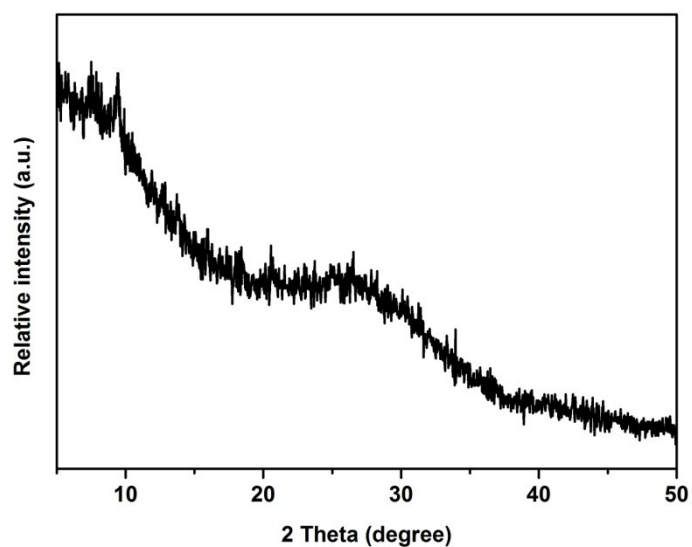**Fig.S1** XRD pattern of the prepared milled seeds.

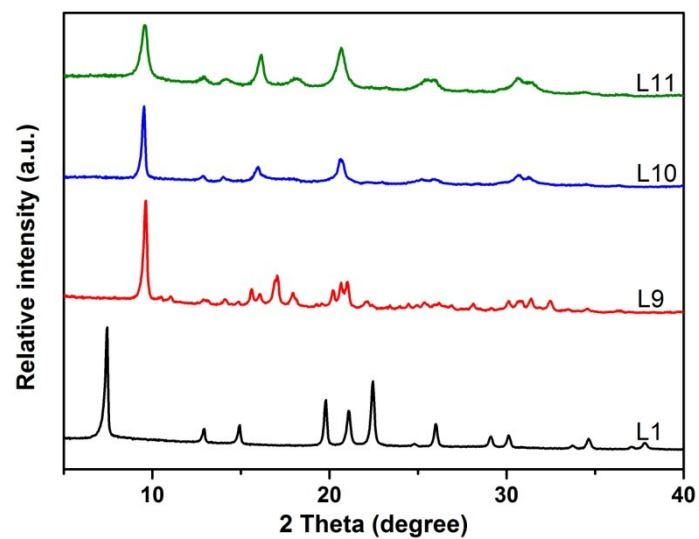

**Fig. S2** XRD patterns of as-synthesized SAPO samples.

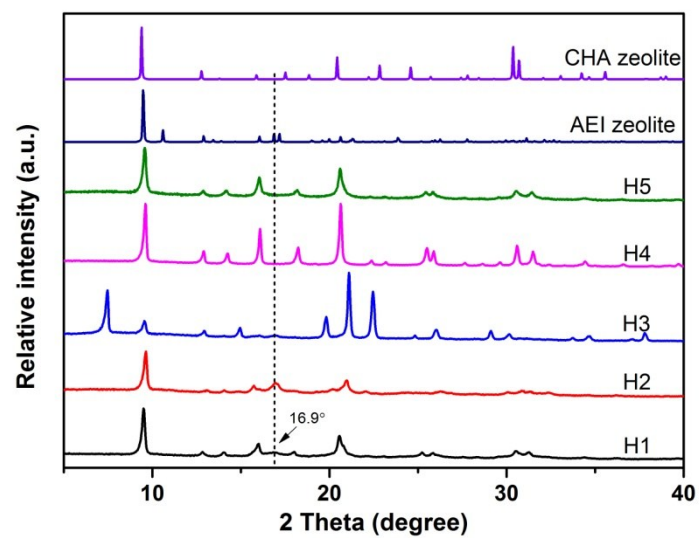

**Fig. S3** XRD patterns of as-synthesized reference samples obtained at higher temperature. The emergence of small peak around 16.9° in the patterns indicates the formation of SAPO-34/18 (CHA/AEI) intergrowth in samples H1-H3.

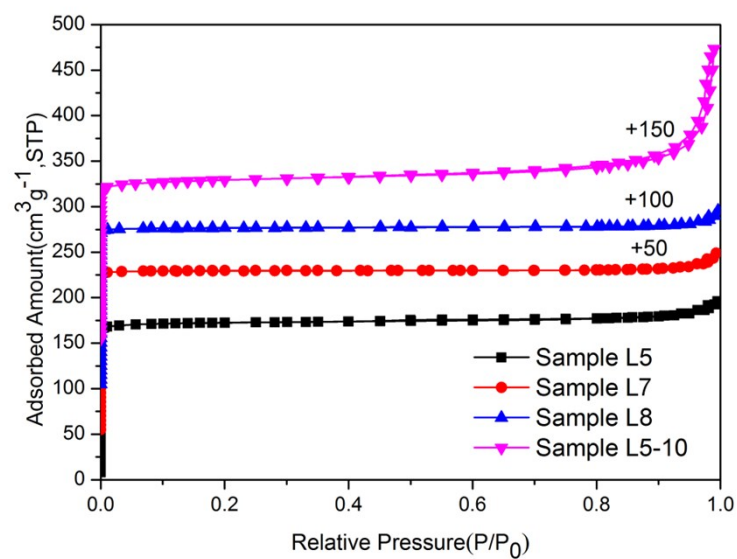

**Fig. S4**  $N_2$  adsorption-desorption isotherms of low-silica SAPO-34 samples (the isotherms of sample L7, L8, L5-10 are vertically offset by 50, 100 and 150  $cm^3 g^{-1}$ , respectively).

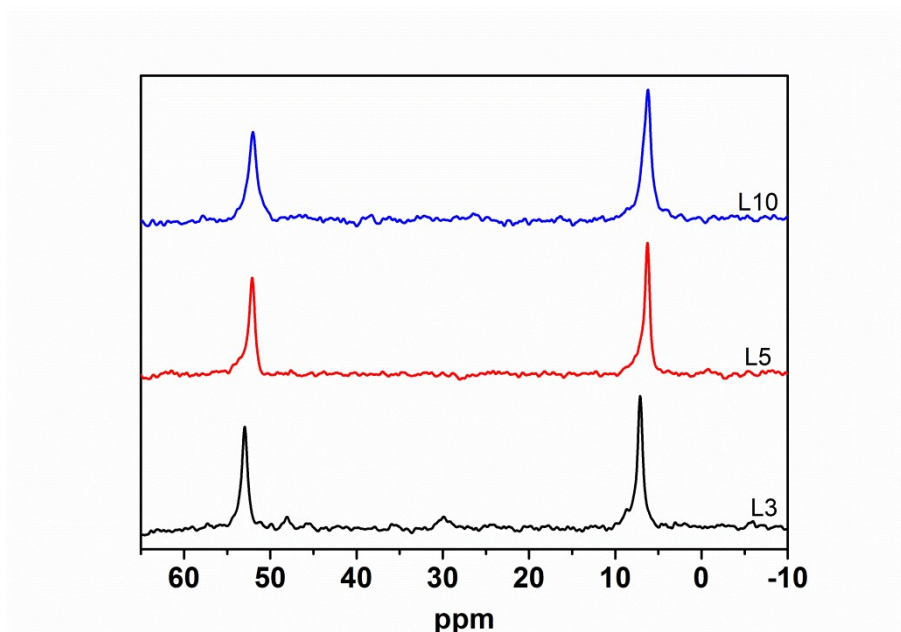

**Fig. S5**  $^{13}C$  MAS NMR spectra of as-synthesized low-silica samples.

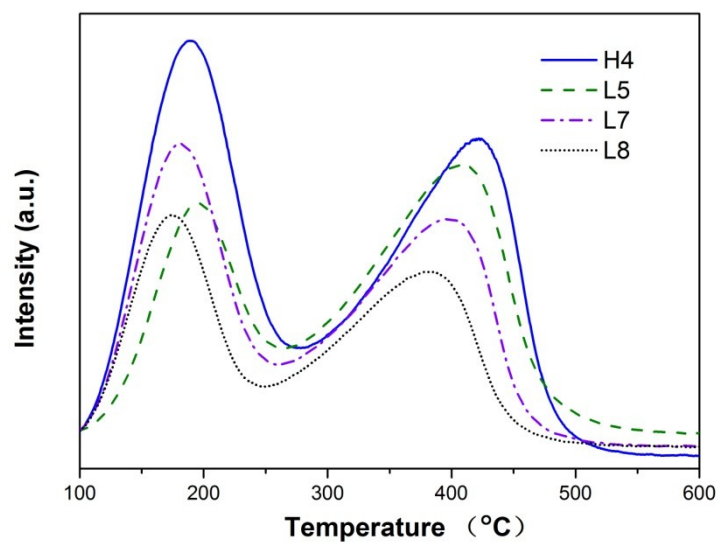

Fig. S6 NH<sub>3</sub>-TPD profiles of selected SAPO samples.

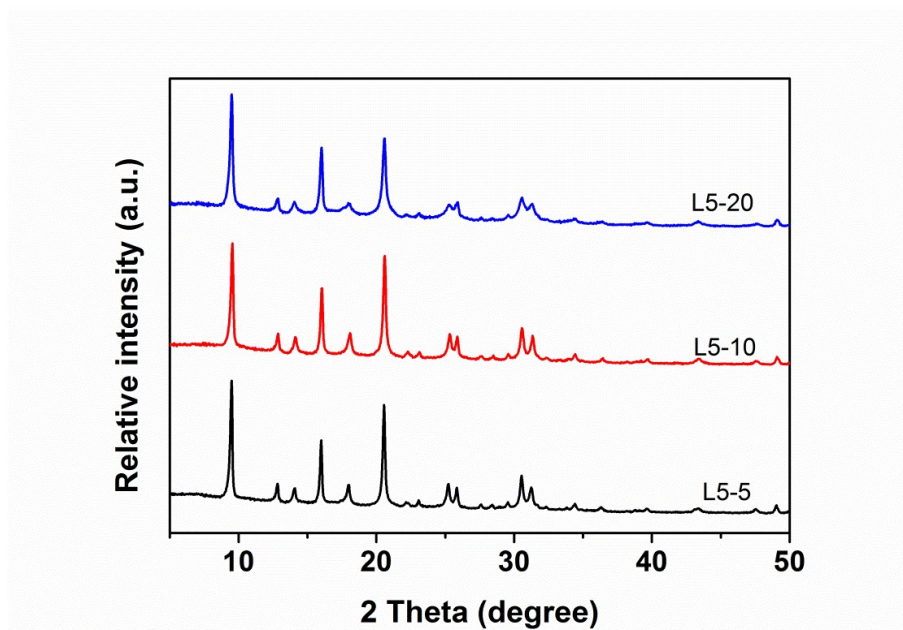

Fig. S7 XRD patterns of low-silica SAPO-34 nanocrystals synthesized under the assistance of seeds.

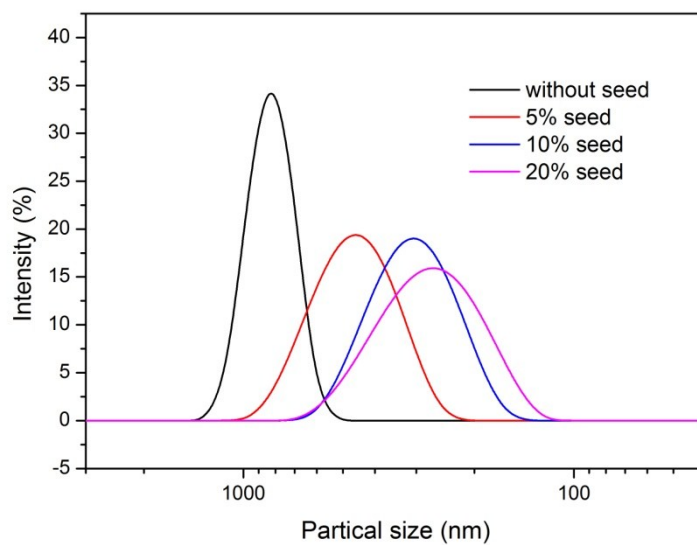

**Fig. S8** . Intensity-weighted size distribution curve of SAPO-34 samples with different amounts of seeds.

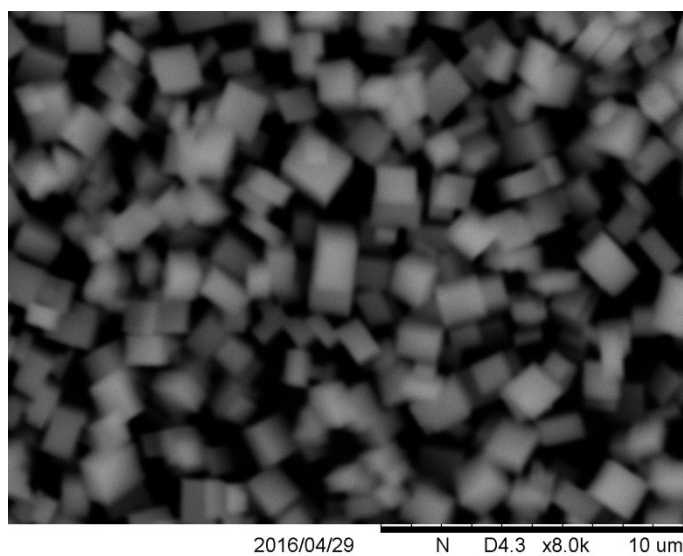

**Fig. S9** SEM image of sample H4.

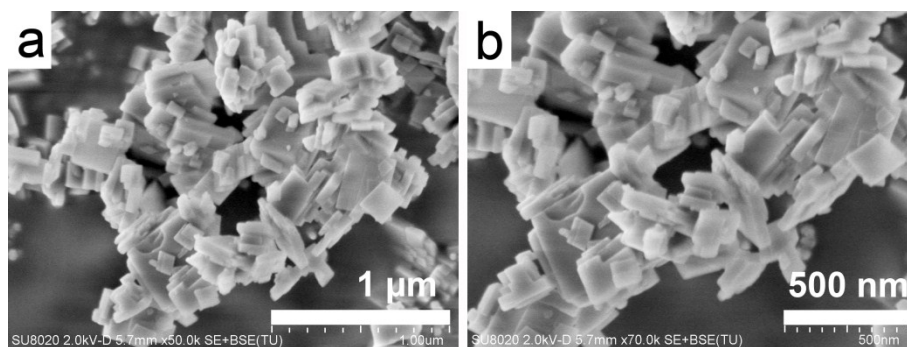

**Fig. S10** SEM images of sample H5.

## Reference

1. D. Fan, P. Tian, S. Xu, D. Wang, Y. Yang, J. Li, Q. Wang, M. Yang and Z. Liu, *New J. Chem.*, 2016, **40**, 4236-4244.
2. M. Yang, P. Tian, C. Wang, Y. Yuan, Y. Yang, S. Xu, Y. He and Z. Liu, *Chem. Commun.*, 2014, **50**, 1845-1847.
